# Supplementary material for: Oxygen Saturation on Admission Is a Predictive Biomarker for PD-L1 Expression on Circulating Monocytes and Impaired Immune Response in Patients With Sepsis
Source: PubMed Central journal article supplement (PMC6131191; doi:10.3389/fimmu.2018.02008), 2018-09-04
Supplement: Image_2.pdf [file Image_2.pdf]

\*  $P=.0317$

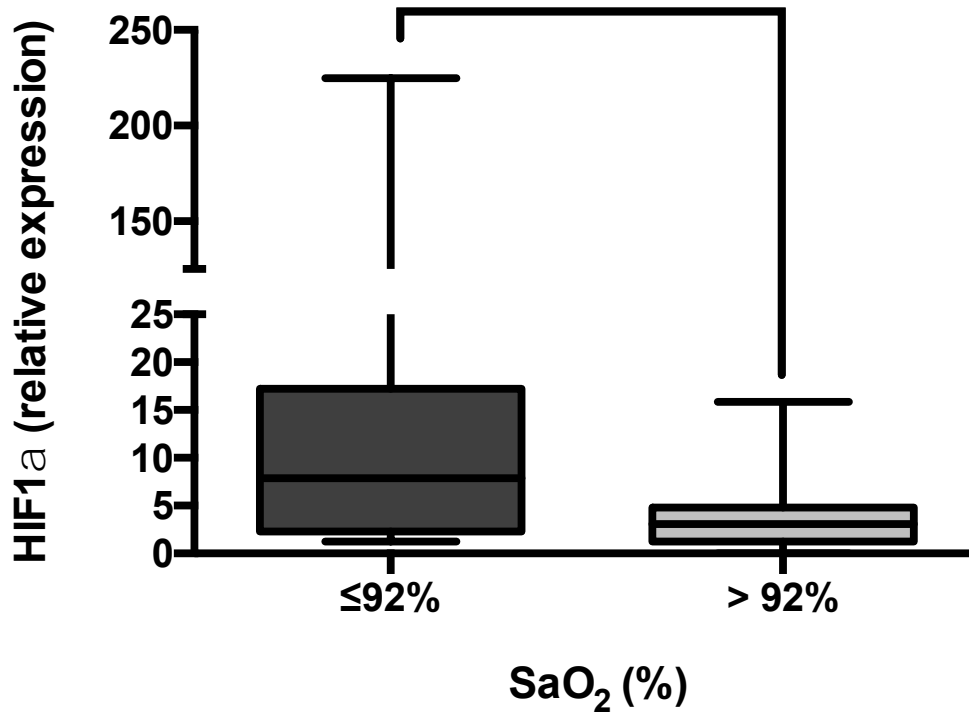

**Supplementary Figure 2. HIF1 $\alpha$  expression is higher in patients with low oxygen saturation.**

Peripheral blood mononuclear cells (PBMCs) from patients with sepsis (n=40, randomly selected) were cultured on adherent plates for 1 hour. Then, adherent cells ( $\approx 90\%$  CD14<sup>+</sup>) were harvested and RNA isolated. Levels of HIF1 $\alpha$  relative expression were analysed by real time Q-PCR. \*,  $p < .05$  using a Student's t-test.
